# Supplementary material
Source: Royal Society of Chemistry journal article supplement (doi:10.1039/d6dt00621c)
Supplement: d6dt00621c1.pdf [file d6dt00621c1.pdf]

## Supporting Information

# Disentangling anisotropy and exchange in $\text{Co}(\text{NCX})_2$ ( $X = \text{S}, \text{Se}$ ) chains via THz-EPR spectroscopy

Jooris Beyer<sup>a</sup>, Michael Böhme<sup>a</sup>, Michał Rams<sup>b</sup>, Christian Näther<sup>c</sup> and  
Winfried Plass<sup>a</sup>

<sup>[a]</sup> Institut für Anorganische und Analytische Chemie, Friedrich-Schiller-Universität Jena, Humboldtstr. 8, 07743 Jena, Germany; email: [sekr.plass@uni-jena.de](mailto:sekr.plass@uni-jena.de)

<sup>[b]</sup> Institute of Physics, Jagiellonian University, Łojasiewicza 11, 30348 Kraków, Poland; email: [m.rams@uj.edu.pl](mailto:m.rams@uj.edu.pl)

<sup>[c]</sup> Institut für Anorganische Chemie, Christian-Albrechts-Universität zu Kiel, Max-Eyth-Straße 2, 24118 Kiel, Germany; email: [cnaether@ac.uni-kiel.de](mailto:cnaether@ac.uni-kiel.de)

## Contents

|                   |                                                                                                                                                                                         |     |
|-------------------|-----------------------------------------------------------------------------------------------------------------------------------------------------------------------------------------|-----|
| <b>Table S1</b>   | Selected crystal data and details of the structure determinations for <b>1</b> and <b>2</b> .                                                                                           | S3  |
| <b>Figure S1</b>  | Structural models for <i>ab initio</i> calculations on <b>1</b> and <b>2</b> .                                                                                                          | S4  |
| <b>Figure S2</b>  | Experimental and calculated PXRD pattern for compound <b>2</b> .                                                                                                                        | S5  |
| <b>Figure S3</b>  | IR spectrum of <b>2</b> .                                                                                                                                                               | S5  |
| <b>Figure S4</b>  | Experimental and calculated PXRD pattern for $\text{Co}(\text{NCSe})_2(\text{pyridine})_4$ .                                                                                            | S6  |
| <b>Figure S5</b>  | IR spectrum for $\text{Co}(\text{NCSe})_2(\text{pyridine})_4$ .                                                                                                                         | S6  |
| <b>Figure S6</b>  | Experimental and calculated PXRD pattern for compound <b>1</b> .                                                                                                                        | S7  |
| <b>Figure S7</b>  | IR spectrum of <b>1</b> .                                                                                                                                                               | S7  |
| <b>Figure S8</b>  | Crystal structure of compounds <b>1</b> and <b>2</b> with labeling and displacement ellipsoids drawn at the 50% probability level.                                                      | S8  |
| <b>Table S2</b>   | Selected bond length (Å) and angles (°) for <b>1</b> .                                                                                                                                  | S9  |
| <b>Table S3</b>   | Structure parameters obtained by continuous shape measures for <b>1</b> and <b>2</b> .                                                                                                  | S10 |
| <b>Figure S9</b>  | Structural overlay of the coordination sites Co1 and Co2 in <b>1</b> and <b>2</b> .                                                                                                     | S10 |
| <b>Figure S10</b> | Pseudo-hexagonal arrangement of the chains in compounds <b>1</b> and <b>2</b> .                                                                                                         | S11 |
| <b>Figure S11</b> | Influence of the orientation of the axial pyridine ligands on the crystal packing of <b>1</b> and <b>2</b> .                                                                            | S12 |
| <b>Figure S12</b> | Heat capacity of <b>2</b> and its analysis.                                                                                                                                             | S13 |
| <b>Figure S13</b> | Heat capacity of <b>1</b> and its analysis.                                                                                                                                             | S14 |
| <b>Figure S14</b> | THz-EPR spectra of <b>1</b> and <b>2</b> (100–300 $\text{cm}^{-1}$ ).                                                                                                                   | S15 |
| <b>Table S4</b>   | Relative CASSCF energies for <b>1</b> and <b>2</b> .                                                                                                                                    | S16 |
| <b>Table S5</b>   | Relative CASPT2 energies for <b>1</b> and <b>2</b> .                                                                                                                                    | S17 |
| <b>Table S6</b>   | Relative RASSI-SO energies for <b>1</b> and <b>2</b> .                                                                                                                                  | S17 |
| <b>Figure S15</b> | Magnetic axes for the ground state Kramers doublet for <b>1</b> and <b>2</b> .                                                                                                          | S18 |
| <b>Figure S16</b> | Fit of the magnetic susceptibility based on the single-ion <i>ab initio</i> calculations combined with a coupling scheme of an <i>n</i> -membered spin ring for <b>1</b> and <b>2</b> . | S19 |
| <b>Figure S17</b> | Depiction of spin states in energy units of an idealized Ising model coupling constant <i>J</i> for a 12-membered spin ring representing <b>1</b> and <b>2</b> .                        | S20 |

**Table S1.** Selected crystal data and refinement details of the crystal structure determination of **1** and **2**.

|                                                             | <b>1</b>                                                         | <b>2</b>                                                        |
|-------------------------------------------------------------|------------------------------------------------------------------|-----------------------------------------------------------------|
| Formula                                                     | C <sub>12</sub> H <sub>10</sub> CoN <sub>4</sub> Se <sub>2</sub> | C <sub>12</sub> H <sub>10</sub> CoN <sub>4</sub> S <sub>2</sub> |
| MW /g mol <sup>-1</sup>                                     | 427.09                                                           | 333.29                                                          |
| Crystal system                                              | triclinic                                                        | triclinic                                                       |
| Space group                                                 | <i>P</i> $\bar{1}$                                               | <i>P</i> $\bar{1}$                                              |
| <i>a</i> /Å                                                 | 7.7633(2)                                                        | 8.5020(2)                                                       |
| <i>b</i> /Å                                                 | 8.9175(2)                                                        | 8.6022(2)                                                       |
| <i>c</i> /Å                                                 | 16.6894(3)                                                       | 15.5048(3)                                                      |
| $\alpha$ /deg                                               | 95.925(2)                                                        | 93.019(2)                                                       |
| $\beta$ /deg                                                | 97.808(2)                                                        | 96.374(2)                                                       |
| $\gamma$ /deg                                               | 112.002(2)                                                       | 114.495(2)                                                      |
| <i>V</i> /Å <sup>3</sup>                                    | 1046.27(4)                                                       | 1019.40(4)                                                      |
| <i>T</i> /K                                                 | 100.0(1)                                                         | 100.0(1)                                                        |
| <i>Z</i>                                                    | 3                                                                | 3                                                               |
| <i>D</i> <sub>calcd</sub> /g cm <sup>-3</sup>               | 2.034                                                            | 1.629                                                           |
| $\mu$ /mm <sup>-1</sup>                                     | 15.534                                                           | 12.689                                                          |
| 2 $\theta$ <sub>max</sub> /deg                              | 161.6                                                            | 159.1                                                           |
| Refl. collected                                             | 12936                                                            | 9732                                                            |
| Refl. unique                                                | 4477                                                             | 4235                                                            |
| <i>R</i> <sub>int</sub>                                     | 0.0171                                                           | 0.0296                                                          |
| Refl. [ <i>I</i> > 2 $\sigma$ ( <i>I</i> )]                 | 4241                                                             | 3850                                                            |
| Parameters                                                  | 259                                                              | 259                                                             |
| <i>R</i> <sub>1</sub> [ <i>I</i> > 2 $\sigma$ ( <i>I</i> )] | 0.0327                                                           | 0.0354                                                          |
| <i>wR</i> <sub>2</sub> (all data)                           | 0.0998                                                           | 0.1111                                                          |
| GOF                                                         | 1.099                                                            | 1.109                                                           |
| $\Delta\rho$ <sub>max; min</sub> /e Å <sup>-3</sup>         | 0.89, -0.76                                                      | 0.55, -0.58                                                     |

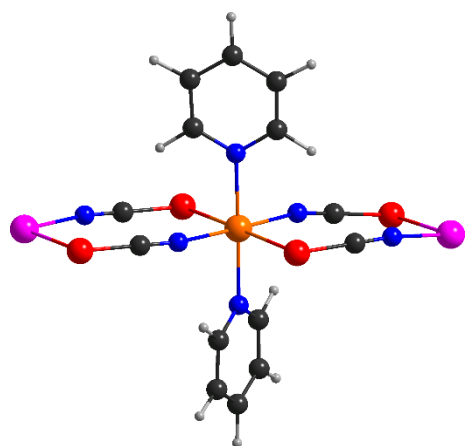

$[\text{CoZn}_2(\text{py})_2(\text{NCSe})_4]^{2+}$  (**1-Co1**)

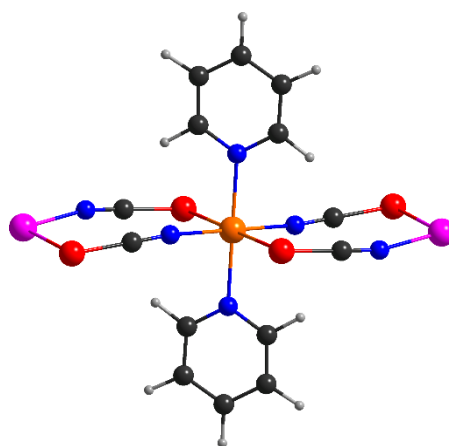

$[\text{CoZn}_2(\text{py})_2(\text{NCSe})_4]^{2+}$  (**1-Co2**)

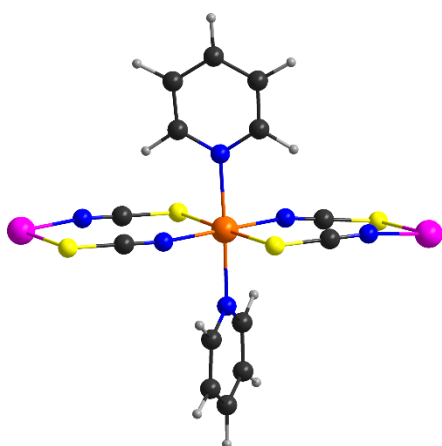

$[\text{CoZn}_2(\text{py})_2(\text{NCS})_4]^{2+}$  (**2-Co1**)

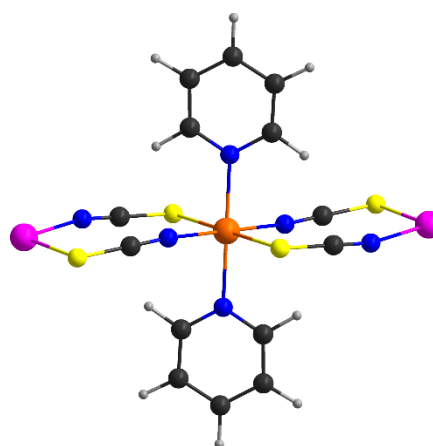

$[\text{CoZn}_2(\text{py})_2(\text{NCS})_4]^{2+}$  (**2-Co2**)

**Figure S1.** Structural models employed for the ab initio calculations of the two crystallographically independent cobalt(II) centers (Co1 and Co2) in **1** (top row) and **2** (bottom row). The pink spheres denote zinc(II) cations introduced to compensate the negative charges of the mononuclear fragments.

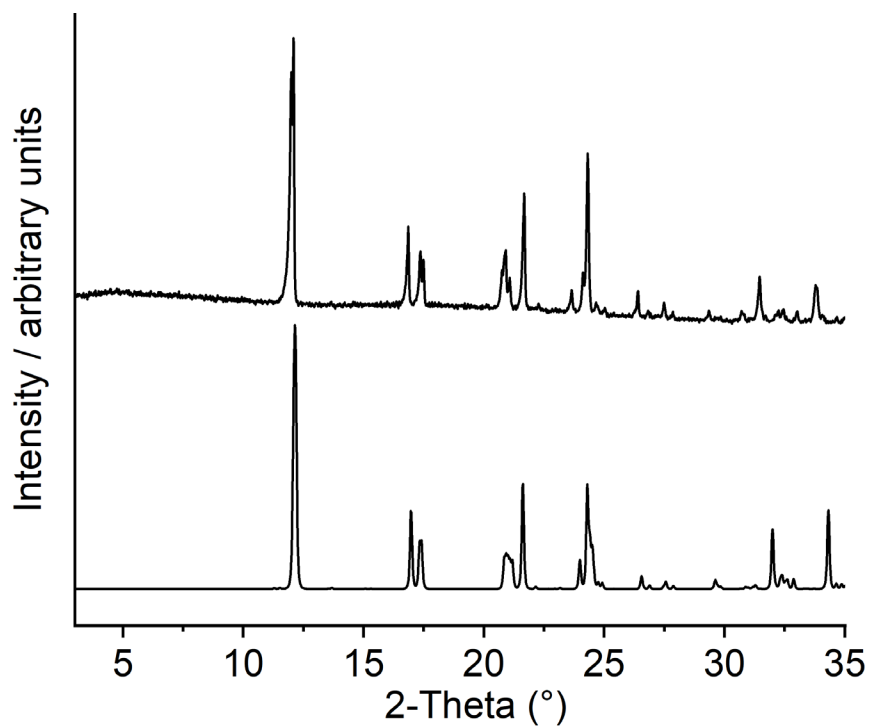

**Figure S2.** Experimental (top) and calculated (bottom) PXR D pattern for compound 2.

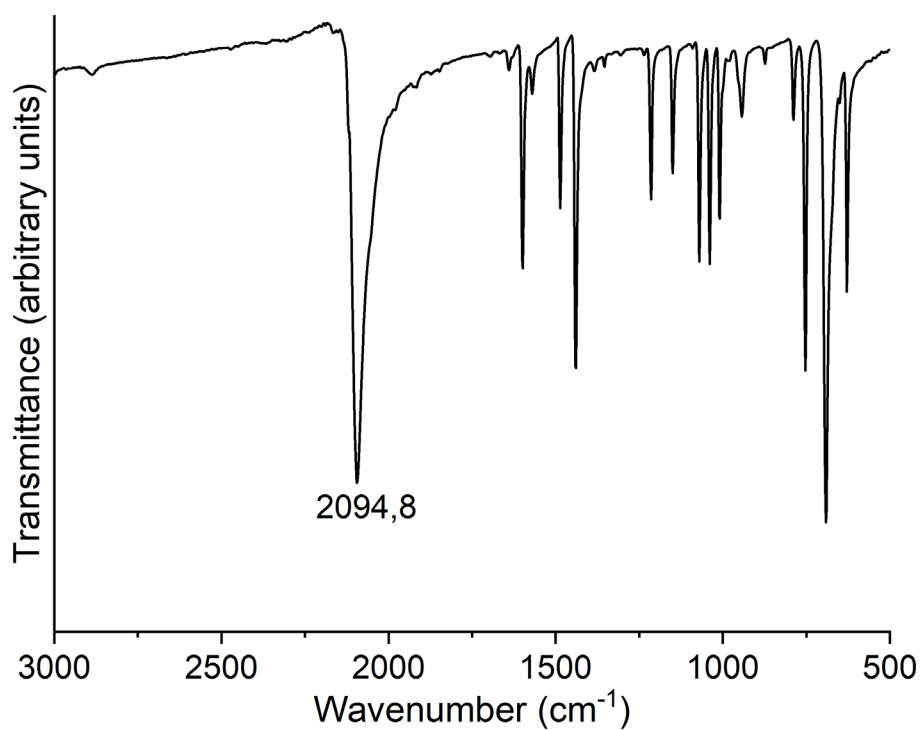

**Figure S3.** IR spectrum of 2. Given is the value of the CN stretching vibration of the thiocyanate anions.

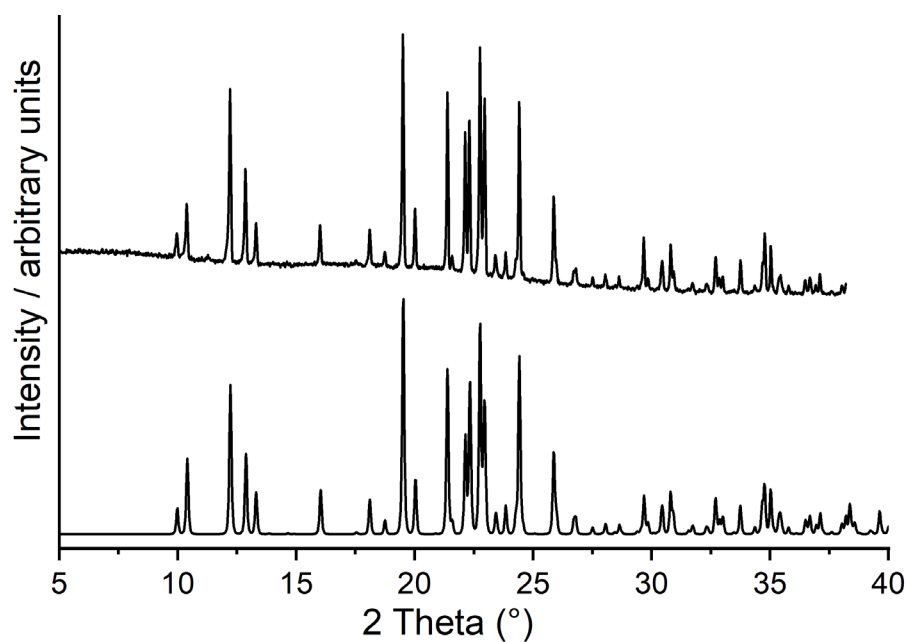

**Figure S4.** Experimental (top) and calculated (bottom) PXR D pattern for  $\text{Co}(\text{NCSe})_2(\text{pyridine})_4$ .

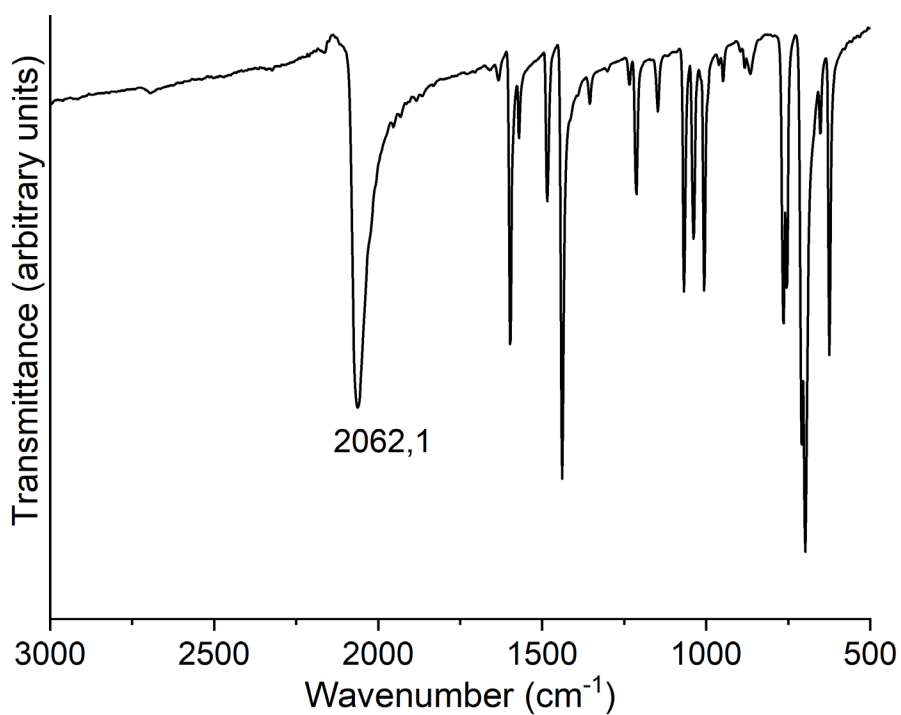

**Figure S5.** IR spectrum for  $\text{Co}(\text{NCSe})_2(\text{pyridine})_4$ .

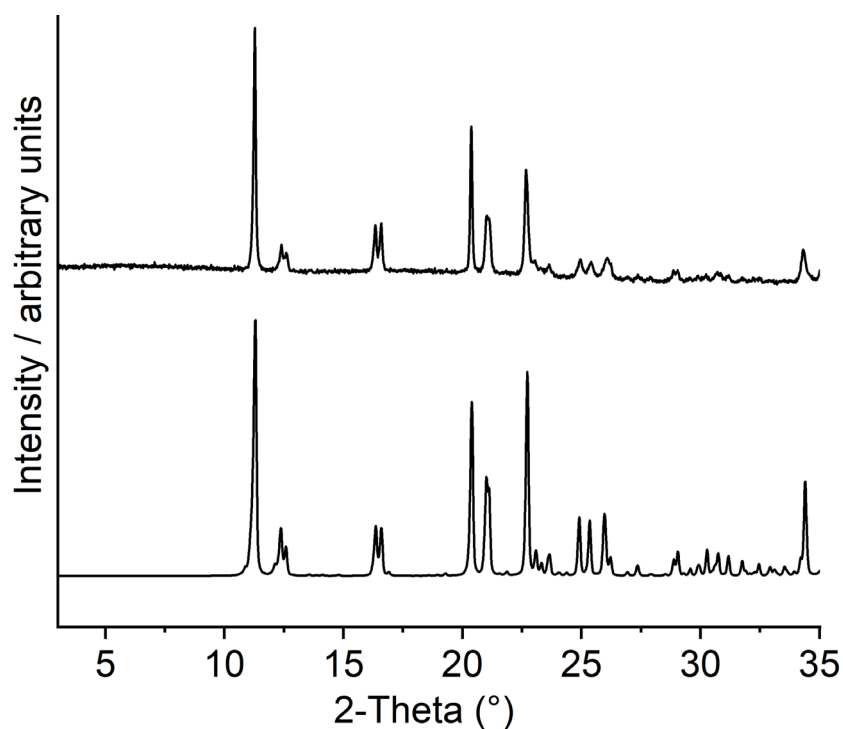

**Figure S6.** Experimental (top) and calculated (bottom) PXRD pattern for compound **1**. Please note, this compound was obtained after the first mass loss in a thermogravimetric measurement of  $\text{Co}(\text{NCSe})_2(\text{pyridine})_4$ .

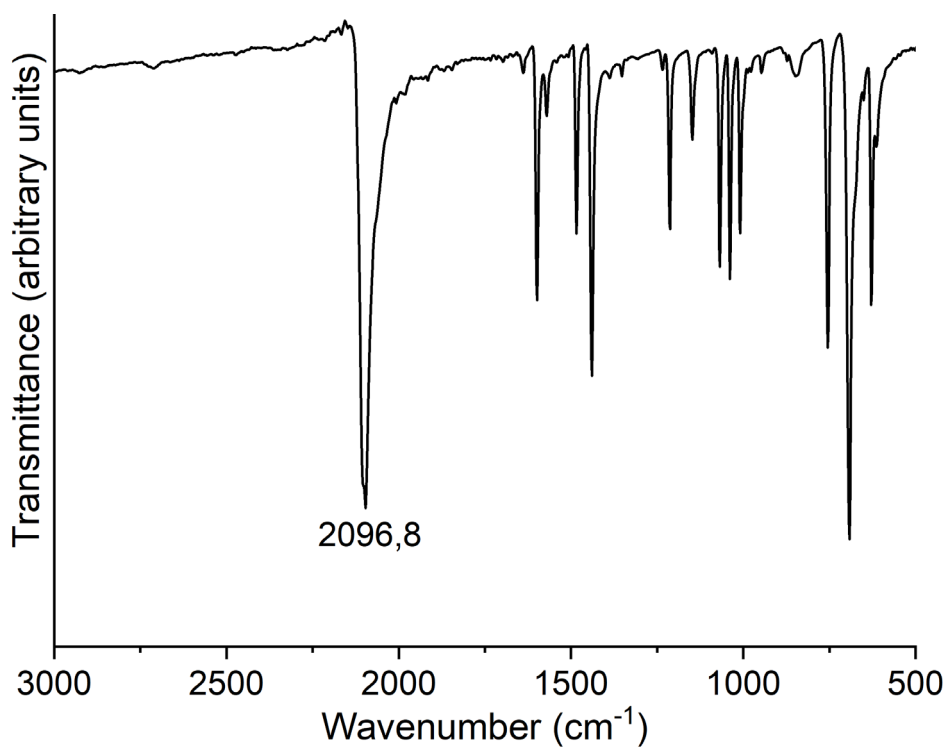

**Figure S7.** IR spectrum of **1**. Given is the value of the CN stretching vibration of the selenocyanate anions.

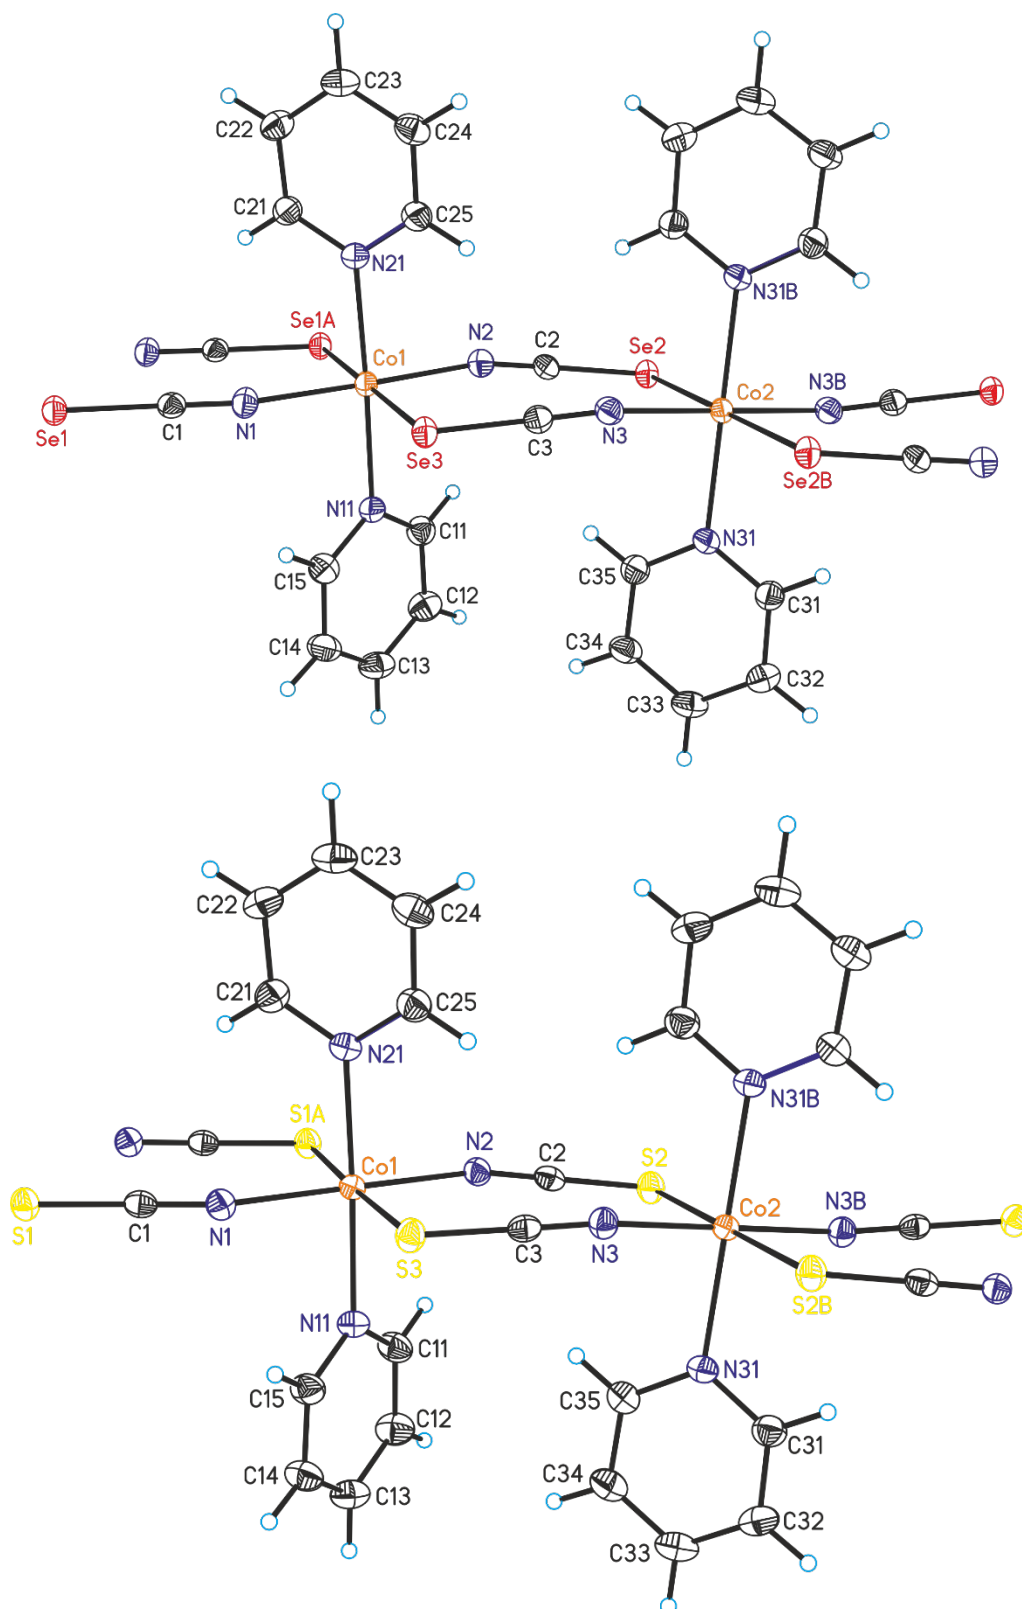

**Figure S8.** Crystal structure of **1** (top) and **2** (bottom) with labelling and displacement ellipsoids drawn at the 50% probability level. Symmetry codes for the generation of equivalent atoms: A =  $-x, -y, 1-z$ ; B =  $-x, 1-y, 2-z$ .

**Table S2.** Selected bond lengths (in Å) and angles (in °) for compound **1** and **2**. Symmetry codes for the generation of equivalent atoms: A = -x, -y, 1-z; B = -x, 1-y, 2-z.

| Compound 1 |      |      |             | Compound 2      |      |                  |             |
|------------|------|------|-------------|-----------------|------|------------------|-------------|
| Co1        | N1   |      | 2.057(2)    | Co1             | N1   |                  | 2.0562(17)  |
| Co1        | Se1A |      | 2.7055(5)   | Co1             | S1A  |                  | 2.5807(5)   |
| Co1        | N2   |      | 2.063(2)    | Co1             | N2   |                  | 2.0593(17)  |
| Co1        | Se3  |      | 2.7149(5)   | Co1             | S3   |                  | 2.5881(5)   |
| Co1        | N11  |      | 2.173(2)    | Co1             | N11  |                  | 2.1595(16)  |
| Co1        | N21  |      | 2.160(2)    | Co1             | N21  |                  | 2.1596(16)  |
| Co2        | Se2B |      | 2.7365(3)   | Co2             | S2B  |                  | 2.6092(5)   |
| Co2        | Se2  |      | 2.7365(3)   | Co2             | S2   |                  | 2.6092(5)   |
| Co2        | N3   |      | 2.053(2)    | Co2             | N3   |                  | 2.0559(17)  |
| Co2        | N3B  |      | 2.053(2)    | Co2             | N3B  |                  | 2.0560(17)  |
| Co2        | N31  |      | 2.158(2)    | Co2             | N31  |                  | 2.1524(16)  |
| Co2        | N31B |      | 2.158(2)    | Co2             | N31B |                  | 2.1524(16)  |
| N1         | Co1  | Se1A | 93.86(7)    | N1              | Co1  | S1A              | 95.10(5)    |
| N1         | Co1  | N2   | 178.14(8)   | N1              | Co1  | N2               | 178.76(5)   |
| N1         | Co1  | Se3  | 87.99(7)    | N1              | Co1  | S3               | 87.30(5)    |
| N1         | Co1  | N11  | 89.95(9)    | N1              | Co1  | N11              | 89.07(7)    |
| N1         | Co1  | N21  | 87.60(9)    | N1              | Co1  | N21              | 88.31(6)    |
| Se1        | Co1  | Se3  | 177.402(18) | S1 <sup>1</sup> | Co1  | S3               | 177.578(15) |
| N2         | Co1  | Se1A | 84.58(7)    | N2              | Co1  | S1A              | 83.87(5)    |
| N2         | Co1  | Se3  | 93.61(7)    | N2              | Co1  | S3               | 93.73(5)    |
| N2         | Co1  | N11  | 91.02(9)    | N2              | Co1  | N11              | 90.24(6)    |
| N2         | Co1  | N21  | 91.45(9)    | N2              | Co1  | N21              | 92.40(6)    |
| N11        | Co1  | Se1A | 88.86(6)    | N11             | Co1  | S1A              | 90.12(4)    |
| N11        | Co1  | Se3  | 89.31(6)    | N11             | Co1  | S3               | 90.24(4)    |
| N21        | Co1  | Se1A | 92.01(6)    | N21             | Co1  | S1A              | 90.66(4)    |
| N21        | Co1  | Se3  | 89.89(6)    | N21             | Co1  | S3               | 89.08(4)    |
| N21        | Co1  | N11  | 177.45(8)   | N21             | Co1  | N11              | 177.31(5)   |
| Se2        | Co2  | Se2B | 180.0       | S2              | Co2  | S2B              | 180.0       |
| N3         | Co2  | Se2B | 93.15(7)    | N3              | Co2  | S2B              | 86.24(5)    |
| N3         | Co2  | Se2  | 93.15(7)    | N3              | Co2  | S2B              | 93.76(5)    |
| N3         | Co2  | Se2B | 86.85(7)    | N3              | Co2  | S2               | 93.76(5)    |
| N3         | Co2  | Se2  | 86.85(7)    | N3              | Co2  | S2               | 86.24(5)    |
| N3         | Co2  | N3   | 180.0       | N3              | Co2  | N3B              | 180.00(4)   |
| N3         | Co2  | N31  | 89.63(9)    | N3              | Co2  | N31              | 89.16(6)    |
| N3         | Co2  | N31B | 90.37(9)    | N3              | Co2  | N31B             | 89.16(6)    |
| N3         | Co2  | N31B | 89.63(9)    | N3              | Co2  | N31B             | 90.84(6)    |
| N3         | Co2  | N31  | 90.37(9)    | N3              | Co2  | N31              | 90.84(6)    |
| N31        | Co2  | Se2  | 90.96(6)    | N31             | Co2  | S2               | 89.29(4)    |
| N31        | Co2  | Se2B | 90.96(6)    | N31             | Co2  | S2B              | 89.29(4)    |
| N31        | Co2  | Se2  | 89.04(6)    | N31             | Co2  | S2               | 90.71(4)    |
| N31        | Co2  | Se2B | 89.04(6)    | N31             | Co2  | S2B              | 90.71(4)    |
| N31        | Co2  | N31  | 180.0       | N31             | Co2  | N31 <sup>2</sup> | 180.0       |

**Table S3.** Structure parameters obtained by continuous shape measures for the Co atoms in **1** and **2** for different ideal coordination geometries (OC-6: octahedron; TPR-6: trigonal prism; PPY-6: pentagonal pyramid; JPPY-6: Johnson pentagonal pyramid; HP-6: hexagon)

| compound | atom | OC-6     | TPR-6       | PPY-6       | JPPY-6       | HP-6        |
|----------|------|----------|-------------|-------------|--------------|-------------|
|          |      | $S(O_h)$ | $S(D_{3h})$ | $S(C_{5v})$ | $S(C'_{5v})$ | $S(D_{6h})$ |
| <b>1</b> | Co1  | 1.611    | 17.002      | 28.196      | 30.631       | 32.518      |
|          | Co2  | 1.711    | 17.610      | 29.132      | 31.507       | 32.552      |
| <b>2</b> | Co1  | 1.141    | 16.351      | 28.370      | 30.931       | 31.969      |
|          | Co2  | 1.193    | 17.093      | 29.014      | 31.541       | 32.303      |

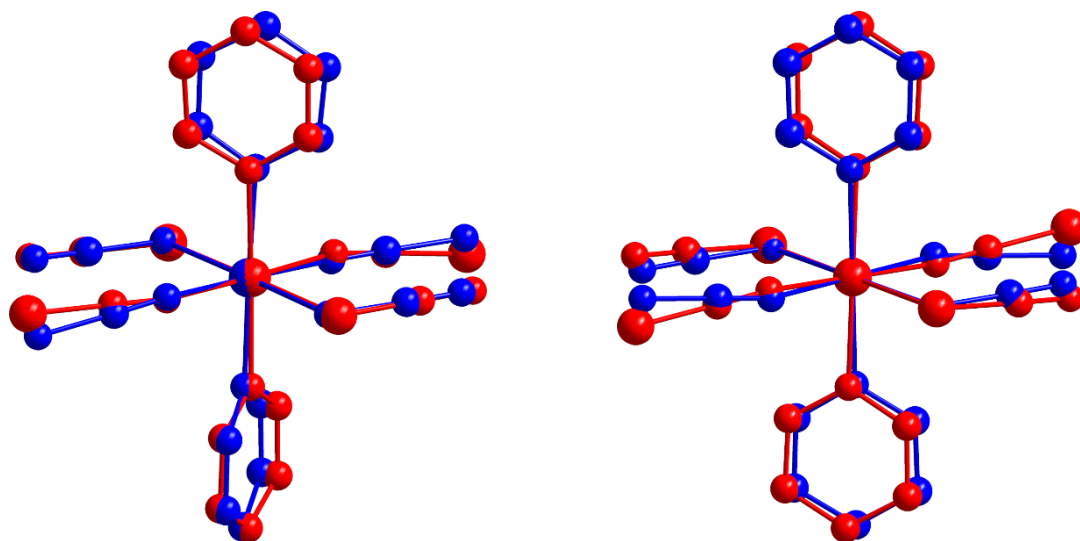

**Figure S9.** Structural overlay of the coordination sites Co1 (left) and Co2 (right) in **1** (red) and **2** (blue), respectively. Hydrogen atoms have been omitted for clarity.

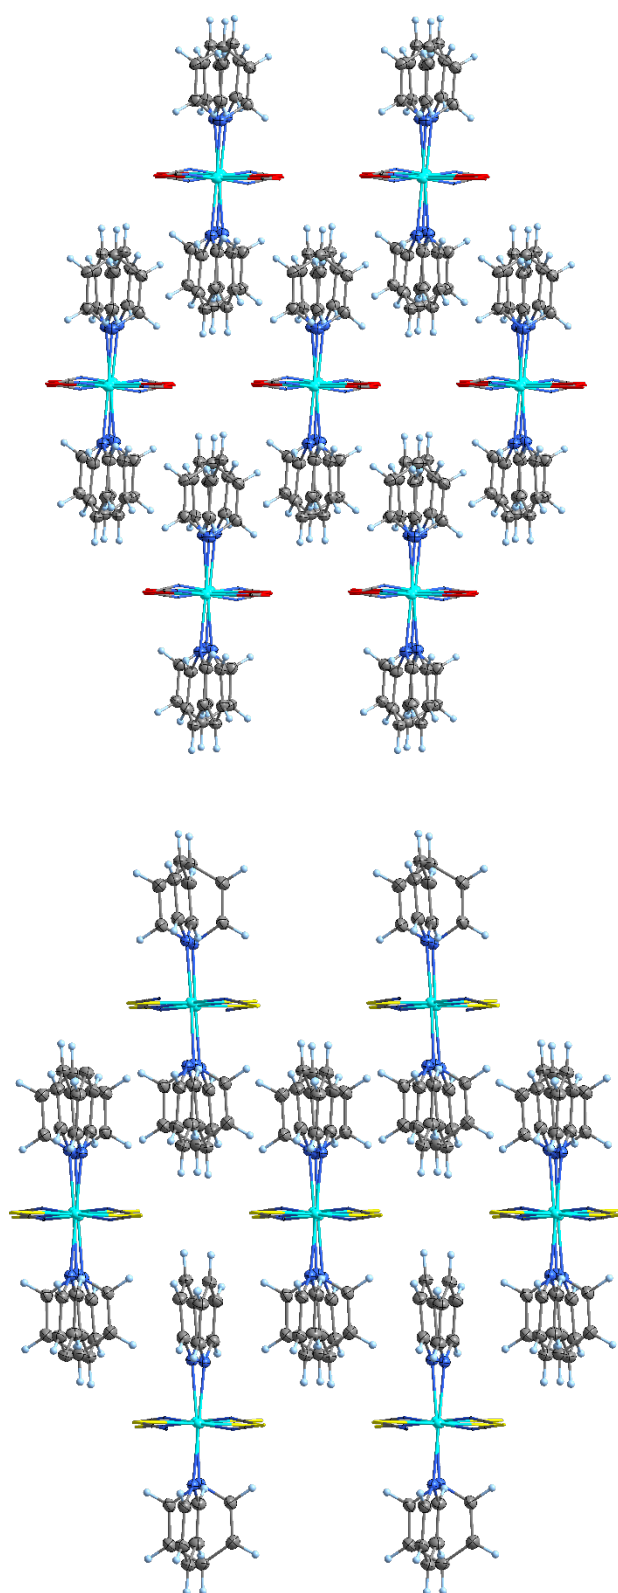

**Figure S10.** Pseudo-hexagonal arrangement of the chains in compounds **1** (top) and **2** (bottom), viewed along the chain direction in the crystal packing.

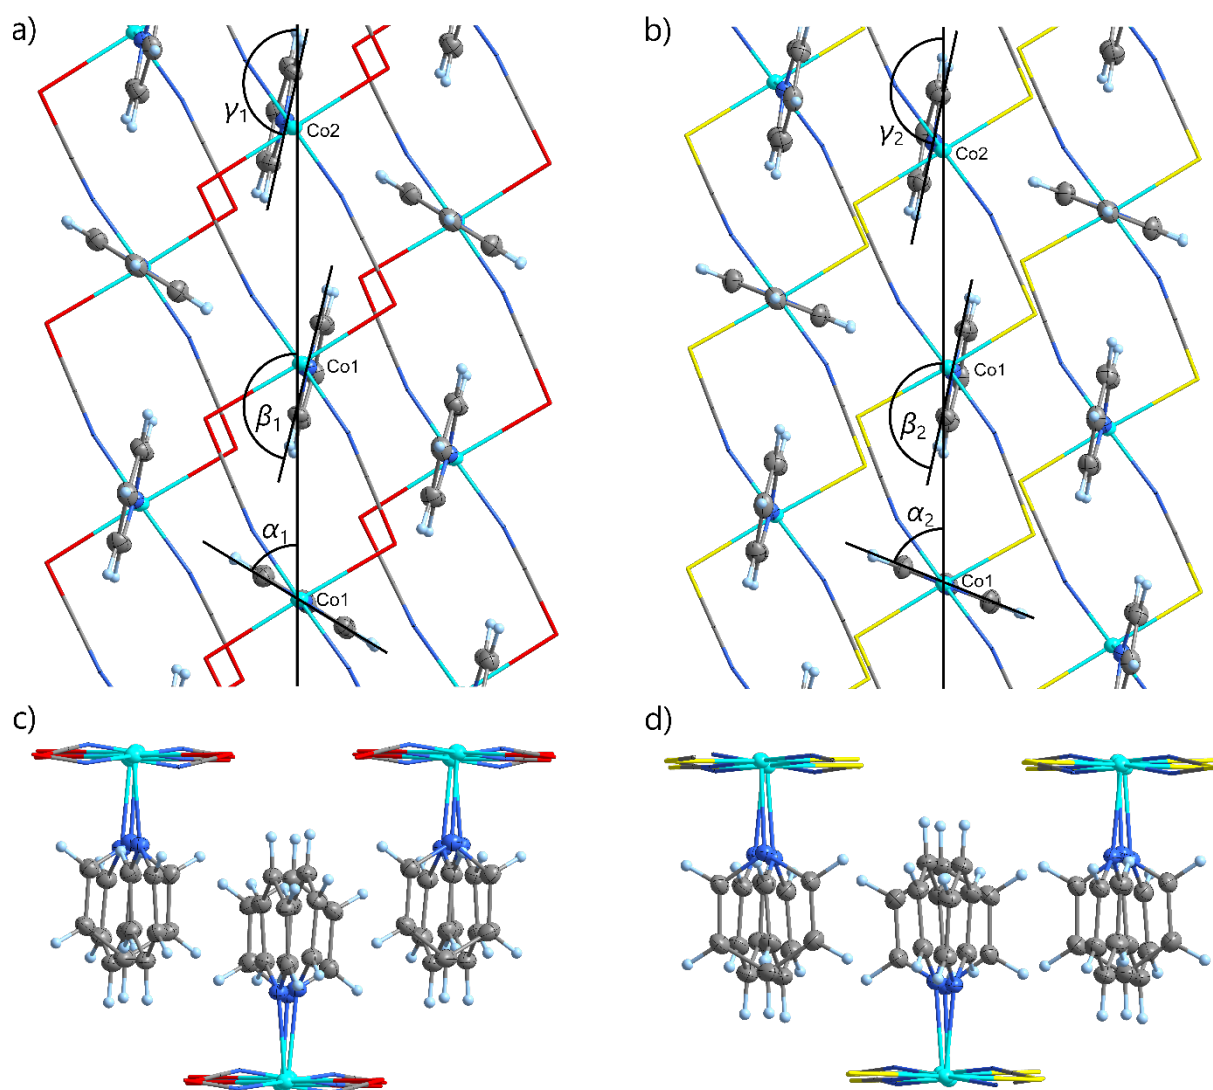

**Figure S11.** Influence of the orientation of the axial pyridine ligands at the cobalt(II) ions on the crystal packing of compound **1** (left) and **2** (right). Bottom: View along the chain direction. Top: View rotated by  $90^\circ$  with respect to the chain direction. The angles between the axial pyridine ligands and the chain axis (in  $^\circ$ ) are given for (i) the selenocyanate compound **1**:  $\alpha_1 = 56.99(2)$  (Co1),  $\beta_1 = 165.43(2)$  (Co1),  $\gamma_1 = 165.43(2)$  (Co2); and (ii) the thiocyanate compound **2**:  $\alpha_2 = 67.52(4)$  (Co1),  $\beta_2 = 168.31(3)$  (Co1),  $\gamma_2 = 167.99(4)$  (Co2).

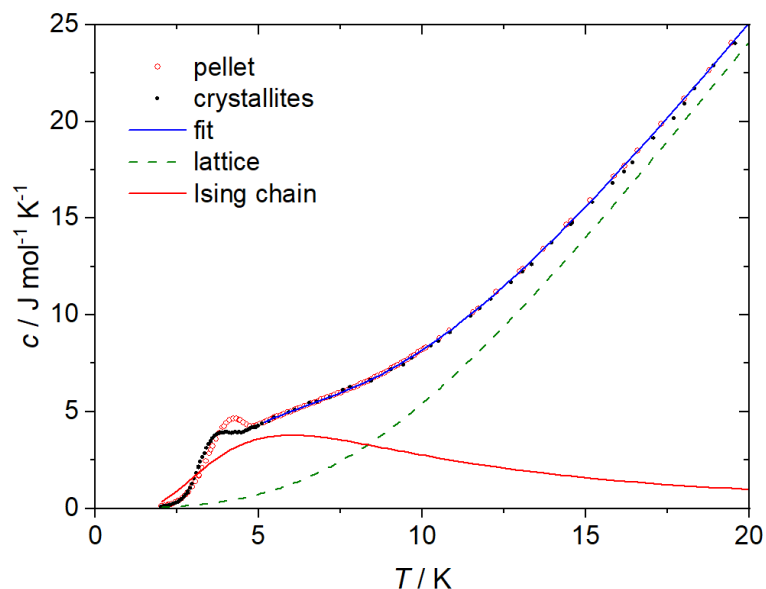

**Figure S12.** Heat capacity  $c(T)$  of compound **2** measured using two samples from the same batch. One sample was pressed into a pellet by temporarily applying a pressure of approximately 1000 bar (200 kg on 5 mm diameter pellet) (red points), while the second sample consisted of crystallites sprinkled onto the microcalorimeter (black points). The mass of the non-pressed sample was determined using scaling the specific heat at 10 K. The influence of sample handling on the critical temperature of magnetic ordering is evident: the non-pressed sample exhibits a maximum in  $c(T)$  at 3.9 K, whereas pressing shifts this maximum to 4.25 K. The solid blue line represents a fit to the data in the temperature range 5–20 K, consisting of the sum of the lattice contribution (dashed line) and the Ising spin-chain contribution (red line). The lattice contribution was modeled as a linear combination of Debye and Einstein phonon contributions. Fit parameters: Debye temperature  $T_D = 85(2)$  K, Einstein temperature  $T_E = 136(9)$  K, exchange coupling  $J_{\text{Ising}}/k_B = 29.2(2)$  K ( $20.3(1)$  cm $^{-1}$ ), based on the Hamiltonian  $-J_{\text{Ising}} \sum_n S_n^z S_{n+1}^z$  for an effective ground-state doublet spin  $S = 1/2$ .

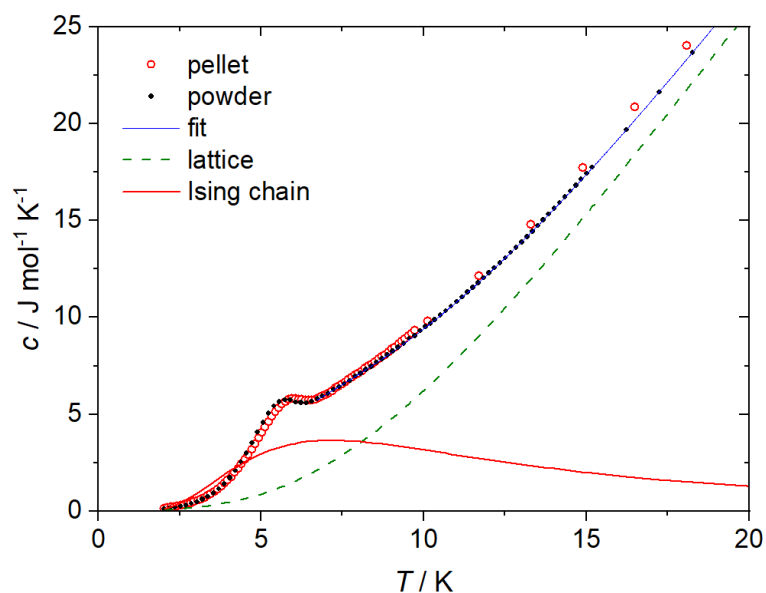

**Figure S13.** Heat capacity  $c(T)$  of two batches of compound **1**. One sample was pressed into a pellet by temporarily applying 1000 bar (red points), while the second sample consists of compacted powder prepared under a pressure of approximately 50 bar (black points). The influence of sample handling on the critical temperature of magnetic ordering is evident: the powder sample exhibits a maximum in  $c(T)$  at 5.8 K, whereas pressing shifts this maximum to 6.0 K. The solid blue line represents a fit to the data in the temperature range 7–20 K, consisting of the sum of the lattice contribution (dashed line) and the Ising spin-chain contribution (red line). Fit parameters:  $T_D = 74(1)$  K,  $T_E = 115(2)$  K, and  $J_{\text{Ising}}/k_B = 34.4(4)$  K ( $23.9 \text{ cm}^{-1}$ ), for details see Figure S12.

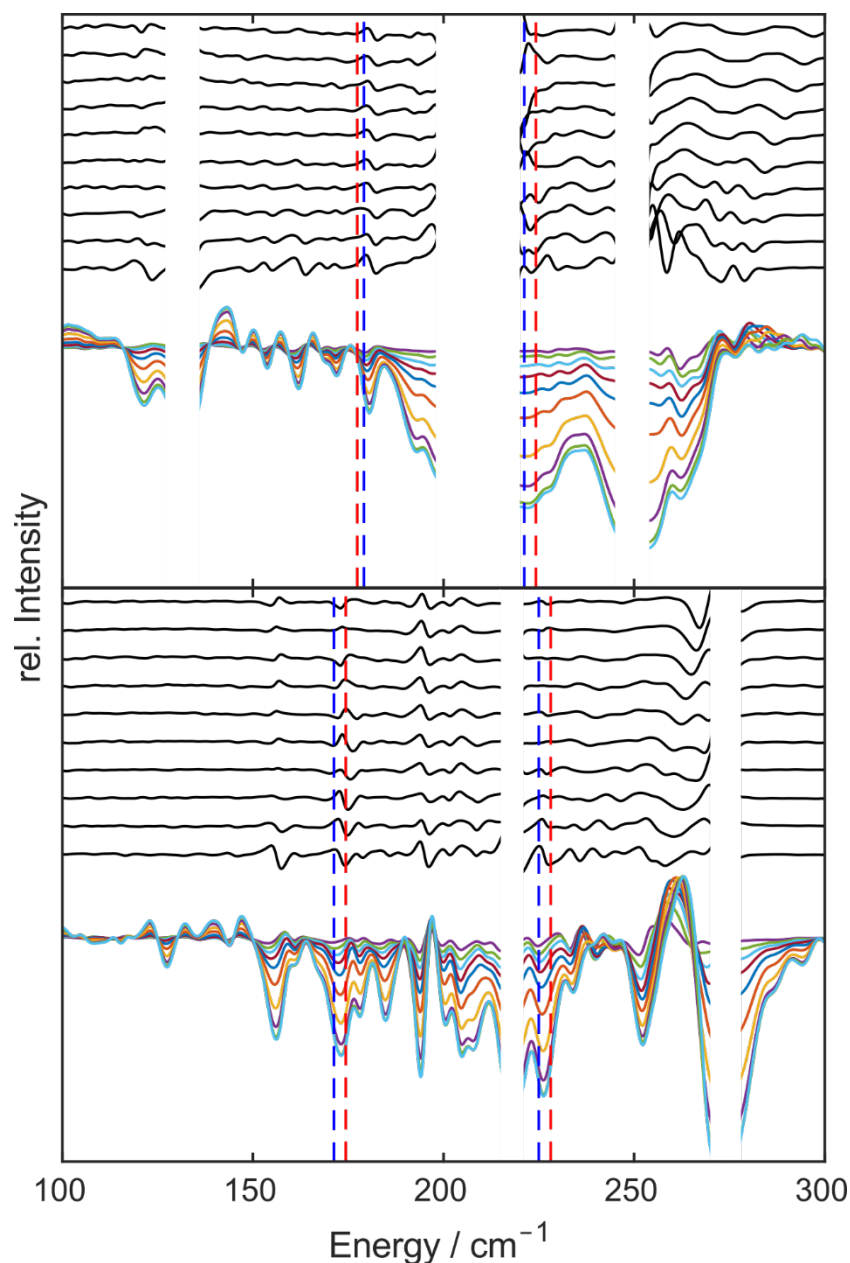

**Figure S14.** Magnetic-field dependence of the THz-EPR spectra of **1** (top) and **2** (bottom) measured at 5 K. The black solid lines represent magnetic-field division spectra (MDS), obtained by dividing a raw spectrum recorded at  $(B_0+1)$  T by that measured at  $B_0$ , with  $B_0$  ranging from 0 T (bottom trace) to 9 T (top trace). The colored spectra at the bottom show the corresponding magnetic-field subtraction spectra (MSS) of **1** and **2**, respectively. The red dashed lines indicate the zero-field transition energies calculated from ab initio methods. For clarity, blank white regions were manually inserted to mask spectral regions with low transmittance and consequently high numerical noise. The assigned transitions are highlighted by blue dashed lines.

**Table S4.** Relative energies for all quartet and the twelve lowest doublet states obtained from ab initio CASSCF and CASPT2 calculations for **1** and **2** (see Figure S1 for depiction of the structural models)

| 2S+1  | Term           | 1-Co1  |                                | 1-Co2  |        | 2-Co1  |        | 2-Co2  |        |
|-------|----------------|--------|--------------------------------|--------|--------|--------|--------|--------|--------|
|       |                | CASSCF | CASPT2                         | CASSCF | CASPT2 | CASSCF | CASPT2 | CASSCF | CASPT2 |
| 4     | <sup>4</sup> F | 0      | 0                              | 0      | 0      | 0      | 0      | 0      | 0      |
|       |                | 253    | 384                            | 501    | 546    | 155    | 276    | 489    | 532    |
|       |                | 973    | 1131                           | 1069   | 1073   | 906    | 931    | 1035   | 919    |
|       |                | 5403   | 6441                           | 5402   | 6262   | 5606   | 6669   | 5566   | 6454   |
|       |                | 7720   | 8717                           | 7951   | 8765   | 7819   | 8921   | 8057   | 8992   |
|       |                | 8758   | 9711                           | 8871   | 9640   | 8710   | 9758   | 8777   | 9638   |
|       | <sup>4</sup> P | 15615  | 17485                          | 15828  | 17558  | 15824  | 17868  | 15932  | 17849  |
|       |                | 21010  | 19117                          | 21151  | 19137  | 21120  | 18768  | 21195  | 18722  |
|       |                | 22320  | 20819                          | 22257  | 20586  | 22337  | 20397  | 22334  | 20246  |
|       |                | 25806  | 23862                          | 26462  | 24454  | 25861  | 23596  | 26409  | 24077  |
|       |                | <hr/>  |                                |        |        |        |        |        |        |
|       |                | 2      | <sup>2</sup> G+ <sup>2</sup> P | 11727  | 9377   | 11517  | 8994   | 11584  | 9076   |
| 15678 | 13092          |        |                                | 16067  | 13384  | 15512  | 12809  | 15969  | 13182  |
| 17539 | 16101          |        |                                | 17358  | 15736  | 17642  | 15784  | 17570  | 15550  |
| 18433 | 16850          |        |                                | 18183  | 16446  | 18403  | 16422  | 18208  | 16106  |
| 19163 | 17597          |        |                                | 19099  | 17353  | 19059  | 16586  | 19085  | 16467  |
| 19718 | 17800          |        |                                | 20040  | 18021  | 19768  | 17052  | 20093  | 17272  |
| 20695 | 18871          |        |                                | 20861  | 18924  | 20642  | 17955  | 20840  | 18060  |
| 21241 | 19304          |        |                                | 21302  | 19238  | 21225  | 18360  | 21336  | 18377  |
| 24132 | 21649          |        |                                | 24150  | 21632  | 24165  | 20733  | 24202  | 20722  |
| 24450 | 22568          |        |                                | 24346  | 22325  | 24492  | 21560  | 24459  | 21418  |
| 24645 | 23871          |        |                                | 24773  | 23869  | 24791  | 23147  | 24887  | 23080  |
| 24916 | 21973          |        |                                | 24942  | 21862  | 24890  | 21097  | 24968  | 21053  |

**Table S5.** Relative RASSI-SO energies (in  $\text{cm}^{-1}$ ) of the six lowest Kramers doublets of the  $^4\text{T}_{1g}$  ground multiplet for the two crystallographically independent cobalt(II) centers in **1** and **2** (see Figure S1 for depiction of the structural models)

| term         | subterm           | KD | 1-Co1 | 1-Co2 | 2-Co1 | 2-Co2 |
|--------------|-------------------|----|-------|-------|-------|-------|
| $^4\text{F}$ | $^4\text{T}_{1g}$ | 1  | 0     | 0     | 0     | 0     |
|              |                   | 2  | 224   | 177   | 228   | 174   |
|              |                   | 3  | 595   | 720   | 547   | 722   |
|              |                   | 4  | 893   | 967   | 847   | 969   |
|              |                   | 5  | 1508  | 1425  | 1363  | 1318  |
|              |                   | 6  | 1580  | 1502  | 1439  | 1407  |

**Table S6.** Cartesian  $g$ -tensor components ( $S_{\text{eff}} = 1/2$ ) for the first two Kramers doublets of Co1 and Co2 in **1** and **2**, as obtained from ab initio calculations (see Figure S1 for depiction of the structural models)

|     |                                   | 1-Co1 | 1-Co2 | 2-Co1 | 2-Co2 |
|-----|-----------------------------------|-------|-------|-------|-------|
| KD1 | $E_{\text{KD1}} (\text{cm}^{-1})$ | 0     | 0     | 0     | 0     |
|     | $g_x$                             | 1.613 | 1.773 | 1.898 | 2.047 |
|     | $g_y$                             | 1.982 | 2.648 | 2.365 | 4.012 |
|     | $g_z$                             | 8.181 | 7.587 | 7.864 | 6.483 |
| KD2 | $E_{\text{KD2}} (\text{cm}^{-1})$ | 224   | 177   | 228   | 174   |
|     | $g_x$                             | 2.204 | 2.089 | 1.860 | 1.014 |
|     | $g_y$                             | 2.912 | 2.190 | 2.640 | 1.221 |
|     | $g_z$                             | 4.325 | 5.239 | 4.418 | 5.451 |

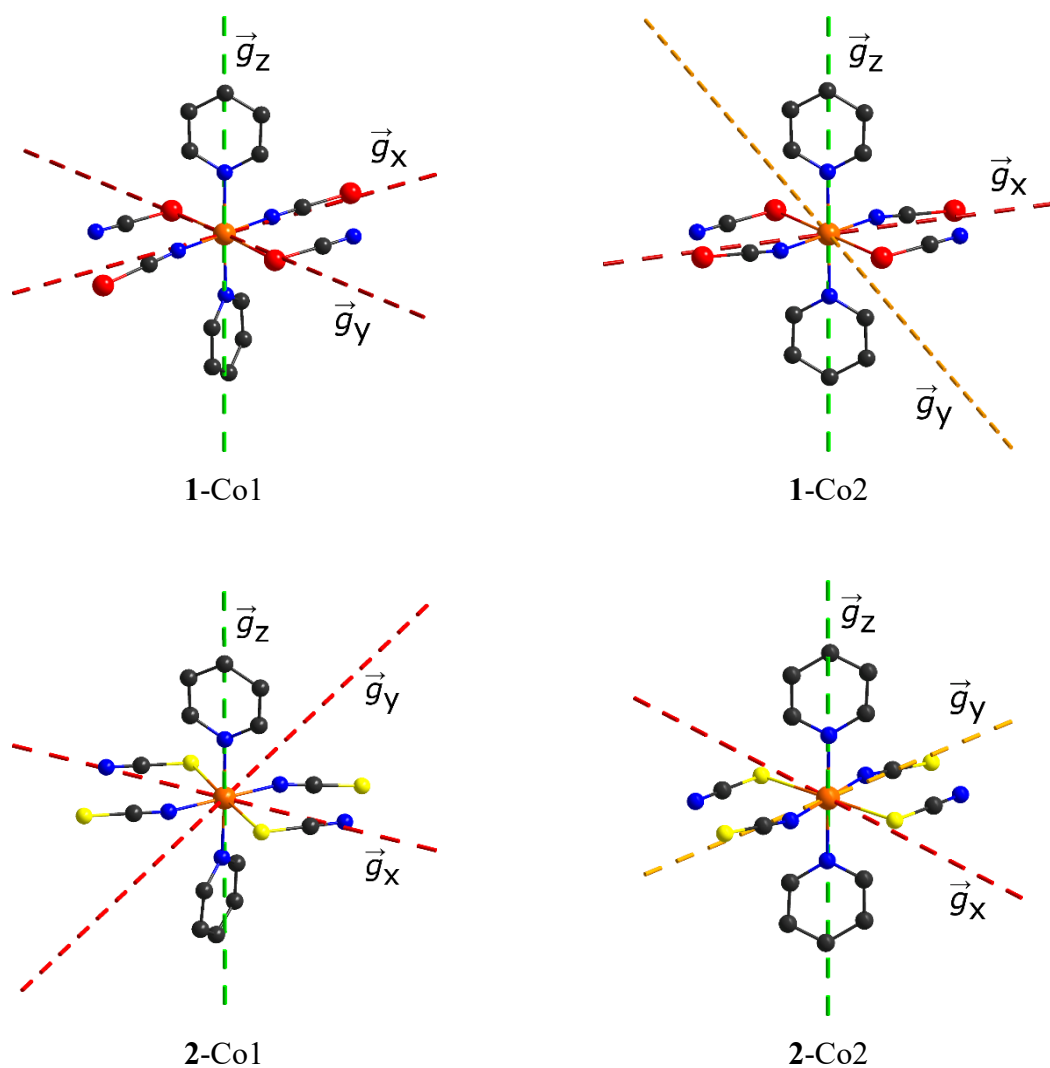

**Figure S15.** Representation of the magnetic axes of the ground state Kramers doublet ( $S_{\text{eff}} = \frac{1}{2}$ ) as obtained from ab initio calculations on the mononuclear model structures of **1** and **2**. Color code: green, easy axis of magnetization ( $g_z$ ); orange, intermediate axis of magnetization ( $g_y$ ); red, hard axis of magnetization ( $g_x$ ).

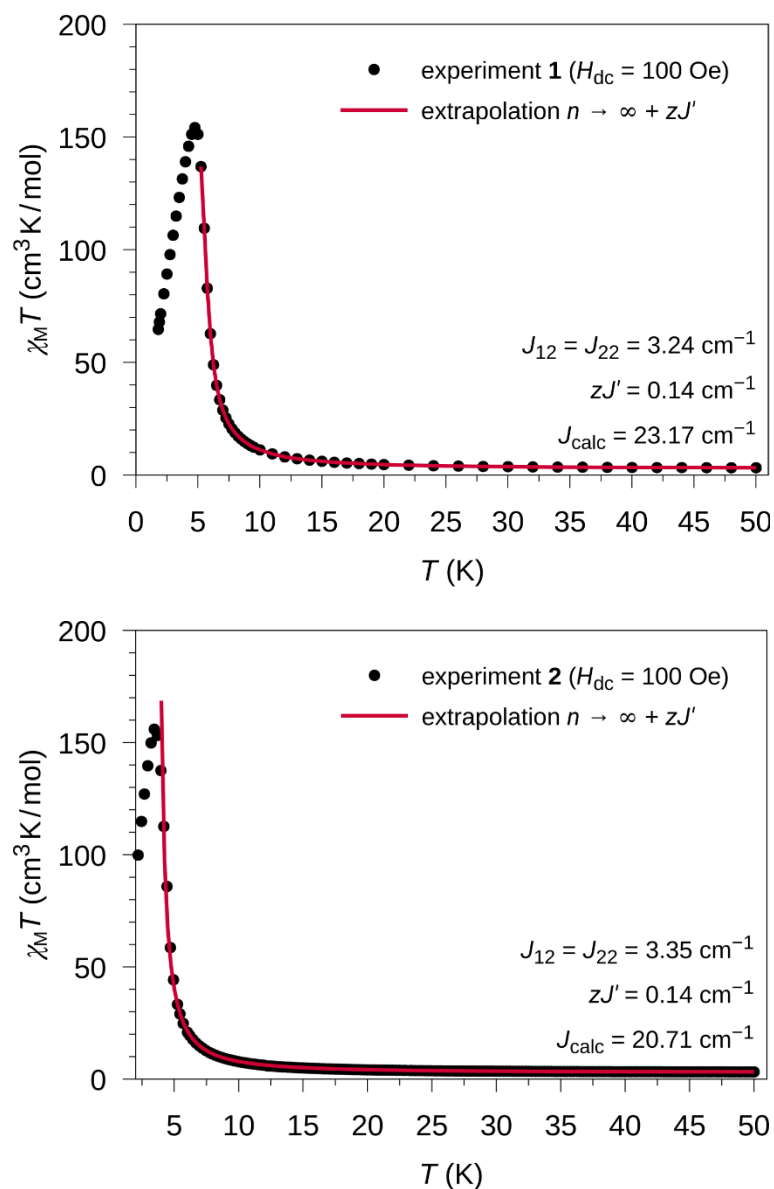

**Figure S16.** Temperature dependence of the experimental  $\chi_M T$  data ( $\bullet$ ) for **1** (top) and **2** (bottom) measured under an applied dc field of 100 Oe. The solid red lines represent a fit of the magnetic susceptibility based on the single-ion parameters using an  $n$ -membered spin-ring coupling scheme extrapolated to  $n \rightarrow \infty$  with mean-field correction.

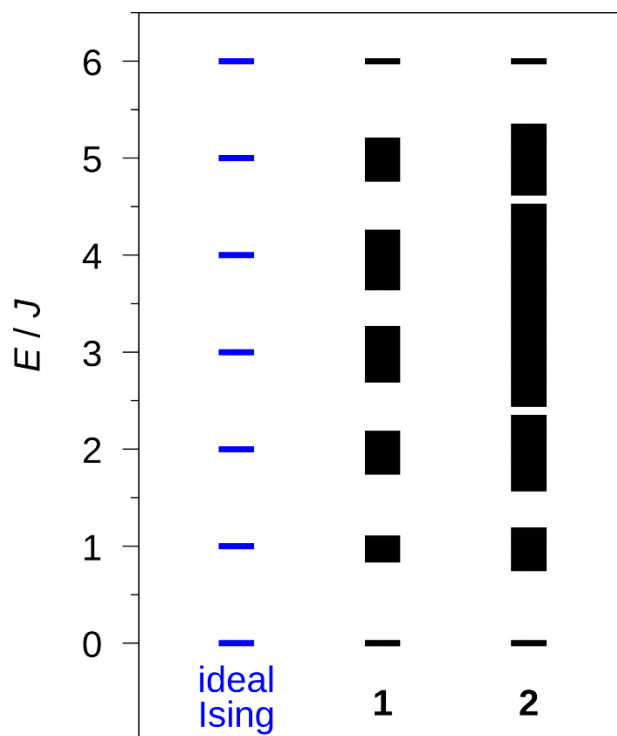

**Figure S17.** Energy-level scheme of spin states expressed in units of the idealized Ising coupling constant  $J$ , as obtained from POLY\_ANISO calculations within the OpenMolcas package of programs using the results of the ab initio calculations of the mononuclear structural models of **1** and **2** (black). For both simulations, a 12-membered spin-ring coupling scheme together with the coupling constant extracted from the Lines model (**1**:  $J_{\text{Lines}} = 3.24 \text{ cm}^{-1}$ ; **2**:  $J_{\text{Lines}} = 3.35 \text{ cm}^{-1}$ ) were employed. The spin states depicted in blue represent the expected multiplet splitting for an ideal Ising anisotropy.
